# Supplementary material for: USP1–UAF1 deubiquitinase complex stabilizes TBK1 and enhances antiviral responses
Source: PubMed Central journal article supplement — J Exp Med. 2017 Dec 4;214(12):3553–63. doi: 10.1084/jem.20170180 (PMC5716033; doi:10.1084/jem.20170180), 2017-12-04
Supplement: JEM_20170180_sm.pdf [file JEM_20170180_sm.pdf]

SUPPLEMENTAL MATERIAL

Yu et al., <https://doi.org/10.1084/jem.20170180>

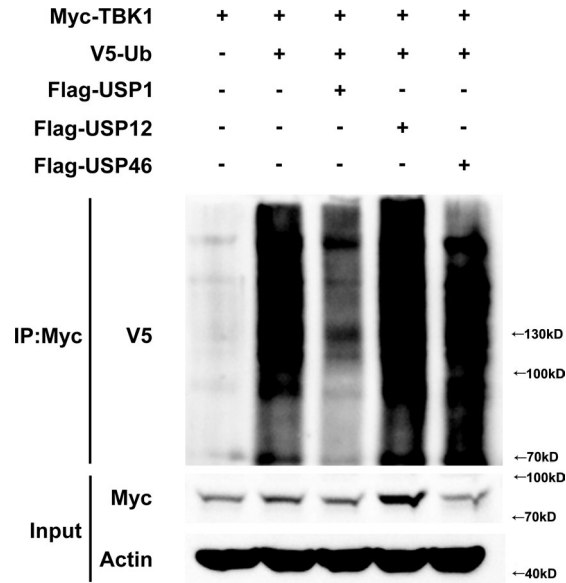

Figure S1. **USP12 and USP46 had no effects on TBK1 ubiquitination.** Western blot analysis of lysates from HEK293T cells transfected with V5-Ub, HA-TBK1 and USP1, USP12, or USP46, followed by immunoprecipitation with anti-HA and probed with anti-V5. This experiment was repeated twice with similar results.

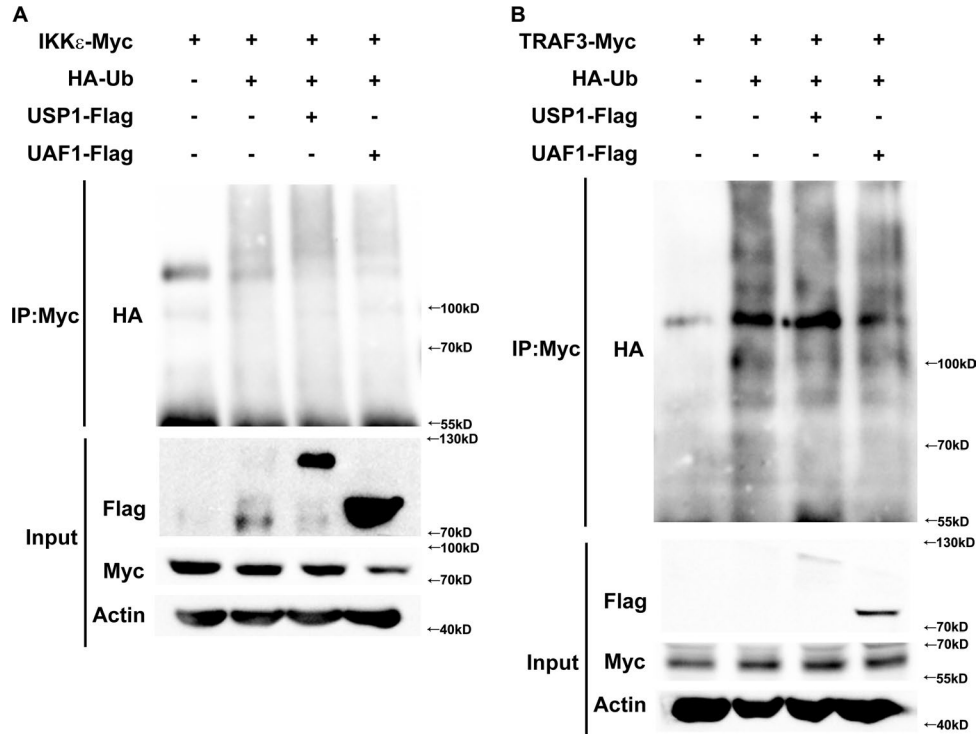

Figure S2. **USP1 and UAF1 had no effects on the ubiquitination of IKK- $\epsilon$  and TRAF3.** (A and B) Western blot analysis of lysates from HEK293T cells transfected with HA-Ub, Myc-IKK- $\epsilon$  (A) or TRAF3 (B), along with USP1 or UAF1, followed by immunoprecipitation with anti-Myc and probed with anti-HA. This experiment was repeated twice with similar results.

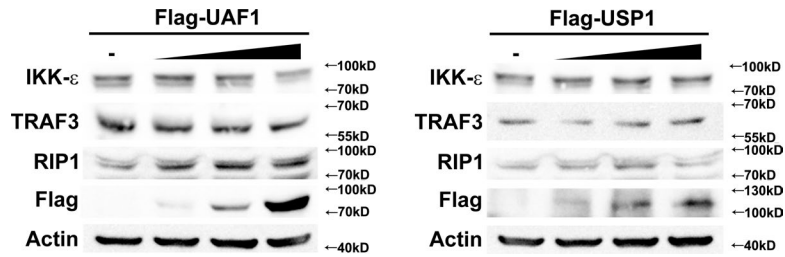

Figure S3. **USP1 and UAF1 had no effects on the expression of IKK- $\epsilon$  and TRAF3.** Western blot analysis of the expression of IKK- $\epsilon$ , TRAF3, and RIP1 in extracts from HEK293T cells transfected with increasing amounts of USP1 or UAF1 expression plasmid. This experiment was repeated twice with similar results.
